# Supplementary material for: Solubilization of hydrophobic alcohols in aqueous Pluronic solutions: investigating the role of dehydration of the micellar core in tuning the restructuring and growth of Pluronic micelles
Source: Royal Society of Chemistry journal article supplement (doi:10.1039/c3sm50600b), 2013-01-01
Supplement: c3sm50600b.pdf [file c3sm50600b.pdf]

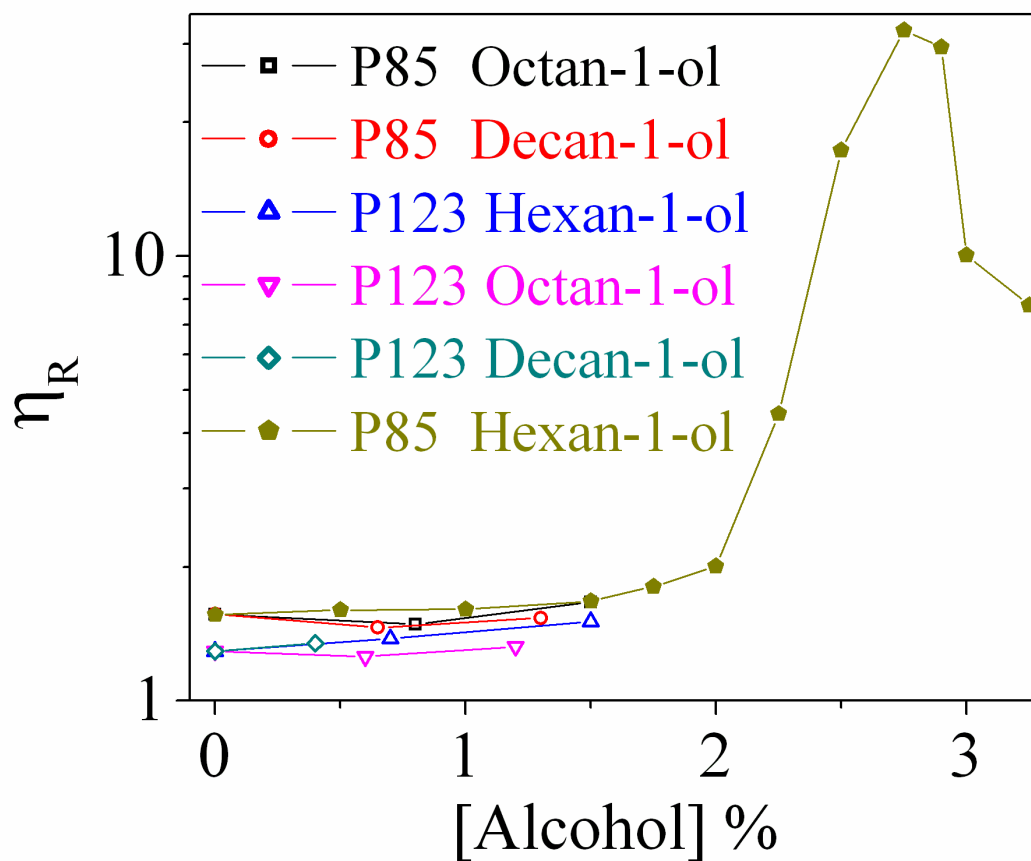

**Figure A:** The variation of relative viscosity as a function of alcohol concentration. Except in the case of P85-Hexan-1-ol system, viscosity changes remain marginal with increase in the concentration of alcohol.
